# Supplementary material
Source: HighWire-hosted journal article supplement (https://erj.ersjournals.com/content/55/1/1901217)
Supplement: inline-supplementary-material-1 [file inline-supplementary-material-1.pdf]

# Trajectory and mortality of Preserved Ratio Impaired Spirometry: the Rotterdam Study

S. R. A. Wijnant<sup>1,2,3</sup>, E. De Roos<sup>1,2</sup>, M. Kabousi<sup>2</sup>, B. H. Stricker<sup>2,4</sup>, N. Terzikhan<sup>2</sup>, L. Lahousse<sup>2,3\*</sup>, G. G. Brusselle<sup>1,2,5\*</sup>

<sup>1</sup>Department of Respiratory Medicine, Ghent University Hospital, Ghent, Belgium;

<sup>2</sup>Department of Epidemiology, Erasmus Medical Center, Rotterdam, The Netherlands;

<sup>3</sup>Department of Bioanalysis, Faculty of Pharmaceutical Sciences, Ghent University, Ghent, Belgium;

<sup>4</sup>Department of Internal Medicine, Erasmus Medical Center, Rotterdam, The Netherlands;

<sup>5</sup>Department of Respiratory Medicine, Erasmus Medical Center, Rotterdam, the Netherlands

\*These authors supervised the work equally.

## Corresponding author:

Guy Brusselle

Department of Respiratory medicine, University Hospital Ghent

Corneel Heymanslaan 10

9000 Ghent, Belgium

[guy.brusselle@ugent.be](mailto:guy.brusselle@ugent.be)

## Supplementary files

### Tables

1. Representativeness of the study subjects with follow-up data.
2. Lung function values at phase 1 and phase 2 stratified by lung function category and smoking status at phase 2.
3. Characteristics at phase 1 by lung function category at phase 1 and phase 2.
4. Lung function values at phase 1 and phase 2 up stratified by lung function category at phase 1 and phase 2.
5. ICD10 classification of cause-specific mortality.
6. Estimates of mortality stratified by lung function categories.

### Figures

1. Flowchart of the Rotterdam Study.
2. Age- and sex-specific prevalence, incidence and mortality of PRISm and COPD.
3. Transitions between lung function categories according to LLN definitions for FEV<sub>1</sub> and the FEV<sub>1</sub>/FVC ratio.

Table S1. Representativeness of the study subjects with follow-up data.

A. Characteristics of subjects from cohort 1 and 2 with and without follow-up spirometry at phase 2.

|                                  | Characteristics at phase 1 of the subgroup with follow-up at phase 2 (n=1603) |                  |                  | Characteristics at phase 1 of the subgroup without follow-up at phase 2 (n=1254) |                  |                  |
|----------------------------------|-------------------------------------------------------------------------------|------------------|------------------|----------------------------------------------------------------------------------|------------------|------------------|
|                                  | Normal-P1 (n=1276)                                                            | PRISm-P1 (n=89)  | COPD-P1 (n=238)  | Normal-P1 (n=856)                                                                | PRISm-P1 (n=121) | COPD-P1 (n=277)  |
| Age (years)                      | 73.7 (4.9)                                                                    | 74.7 (5.7)       | 74.3 (5.0)       | 77.8 (6.1)*                                                                      | 78.2 (6.3)*      | 78.4 (6.1)*      |
| Female sex                       | 729 (57.1)                                                                    | 51 (57.3)        | 106 (44.5)       | 523 (61.1)                                                                       | 64 (52.9)        | 126 (45.5)       |
| BMI (kg/m <sup>2</sup> )         | 27.6 (4.1)                                                                    | 29.1 (3.8)       | 26.6 (3.9)       | 27.7 (4.1)                                                                       | 28.7 (5.0)       | 26.3 (3.8)       |
| Current smoker                   | 85 (6.7)                                                                      | 6 (6.7)          | 29 (12.2)        | 55 (6.4)                                                                         | 20 (16.5)        | 77 (27.8)*       |
| Pack-years (years)               | 3.2 (0.0, 18.8)                                                               | 10.8 (0.0, 29.0) | 19.8 (1.7, 40.4) | 2.3 [0.0, 21.0]                                                                  | 11.3 [0.0, 30.0] | 22.8 [5.2, 42.0] |
| White blood cell count           | 6.8 (1.7)                                                                     | 7.5 (1.8)        | 7.2 (1.7)        | 7.0 (1.8)                                                                        | 7.4 (1.9)        | 7.9 (3.2)        |
| Diabetes mellitus                | 97 (7.7)                                                                      | 6 (6.8)          | 21 (9.1)         | 79 (9.7)                                                                         | 10 (8.9)         | 28 (10.3)        |
| Hypertension                     | 1065 (83.5)                                                                   | 80 (89.9)        | 202 (84.9)       | 757 (88.5)*                                                                      | 115 (95.0)       | 240 (86.6)       |
| Heart failure                    | 34 (2.7)                                                                      | 4 (4.5)          | 11 (4.6)         | 47 (5.5)*                                                                        | 22 (18.3)*       | 34 (12.3)*       |
| Coronary heart disease           | 123 (9.7)                                                                     | 12 (13.5)        | 33 (13.9)        | 103 (12.1)                                                                       | 21 (17.5)        | 47 (17.0)        |
| FEV <sub>1</sub> % predicted (%) | 104.8 (13.8)                                                                  | 72.6 (6.4)       | 77.9 (17.8)      | 104.3 (14.0)                                                                     | 70.4 (8.6)*      | 72.4 (18.1)*     |
| FVC% predicted (%)               | 101.9 (13.2)                                                                  | 72.7 (7.6)       | 92.6 (16.7)      | 100.7 (13.9)*                                                                    | 69.7 (9.9)*      | 87.0 (17.6)*     |
| FEV <sub>1</sub> /FVC (%)        | 78.6 (4.7)                                                                    | 76.3 (5.1)       | 63.5 (6.7)       | 78.8 (4.9)                                                                       | 76.8 (5.0)       | 62.4 (7.1)       |
| DLCO (mmol/min/kPA)              | 7.5 (1.5)                                                                     | 7.2 (1.4)        | 7.2 (1.7)        | 7.1 (1.4)*                                                                       | 7.1 (1.6)        | 6.5 (1.5)*       |
| DLCO/VA (mmol/min/kPA)           | 1.5 (0.2)                                                                     | 1.6 (0.2)        | 1.4 (0.3)        | 1.5 (0.2)*                                                                       | 1.5 (0.3)*       | 1.3 (0.3)*       |
| Deaths before P2 (%)             | NA                                                                            | NA               | NA               | 223 (26.1)                                                                       | 46 (38.0)        | 100 (36.1)       |

PRISm = Preserved Ratio Impaired Spirometry; COPD = Chronic Obstructive Pulmonary Disease; BMI = body mass index; FEV<sub>1</sub> = Forced expiratory volume in one second; FVC = Forced vital capacity; DLCO = diffusion capacity of the lung for carbon monoxide; DLCO/VA = diffusion capacity of the lung for carbon monoxide per alveolar volume. \*P<0.05 compared to subjects with follow-up. Results are presented as mean (SD), count (percentage) or median (interquartile range).

B. Characteristics of subjects from cohort 1 and 2 with follow-up and of subjects from cohort 1 and 2 with loss of follow-up at phase 2 (i.e. no follow-up spirometry at phase 2 and no death before end of phase 2 examinations).

|                                  | Characteristics at phase 1 of the subgroup with follow-up at phase 2 (n=1603) |                  |                  | Characteristics at phase 1 of the subgroup with loss of follow-up at phase 2 (i.e. no follow-up spirometry at phase 2 and no death before end of phase 2) (n=884) |                 |                  |
|----------------------------------|-------------------------------------------------------------------------------|------------------|------------------|-------------------------------------------------------------------------------------------------------------------------------------------------------------------|-----------------|------------------|
|                                  | Normal-P1 (n=1276)                                                            | PRISm-P1 (n=89)  | COPD-P1 (n=238)  | Normal-P1 (n=633)                                                                                                                                                 | PRISm-P1 (n=75) | COPD-P1 (n=177)  |
| Age (years)                      | 73.7 (4.9)                                                                    | 74.7 (5.7)       | 74.3 (5.0)       | 76.9 (5.8)*                                                                                                                                                       | 76.4 (5.9)      | 77.3 (5.8)*      |
| Female sex                       | 729 (57.1)                                                                    | 51 (57.3)        | 106 (44.5)       | 412 (65.1)*                                                                                                                                                       | 46 (61.3)       | 92 (52.0)        |
| BMI (kg/m <sup>2</sup> )         | 27.6 (4.1)                                                                    | 29.1 (3.8)       | 26.6 (3.9)       | 28.0 (4.2)*                                                                                                                                                       | 29.2 (5.2)      | 26.5 (3.9)       |
| Current smoker                   | 85 (6.7)                                                                      | 6 (6.7)          | 29 (12.2)        | 34 (5.4)                                                                                                                                                          | 11 (14.7)       | 45 (25.4)*       |
| Pack-years (years)               | 3.2 (0.0, 18.8)                                                               | 10.8 (0.0, 29.0) | 19.8 (1.7, 40.4) | 1.4 (0.0, 20.0)                                                                                                                                                   | 8.0 (0.0, 25.0) | 19.0 (0.3, 39.0) |
| White blood cell count           | 6.8 (1.7)                                                                     | 7.5 (1.8)        | 7.2 (1.7)        | 6.9 (1.6)                                                                                                                                                         | 7.1 (1.8)       | 7.6 (2.1)*       |
| Diabetes mellitus                | 97 (7.7)                                                                      | 6 (6.8)          | 21 (9.1)         | 59 (9.8)                                                                                                                                                          | 4 (5.6)         | 18 (10.3)        |
| Hypertension                     | 1065 (83.5)                                                                   | 80 (89.9)        | 202 (84.9)       | 558 (88.2)*                                                                                                                                                       | 73 (97.3)       | 148 (83.6)       |
| Heart failure                    | 34 (2.7)                                                                      | 4 (4.5)          | 11 (4.6)         | 25 (4.0)                                                                                                                                                          | 9 (12.2)        | 11 (6.2)         |
| Coronary heart disease           | 123 (9.7)                                                                     | 12 (13.5)        | 33 (13.9)        | 61 (9.7)                                                                                                                                                          | 6 (8.1)         | 23 (13.0)        |
| FEV <sub>1</sub> % predicted (%) | 104.8 (13.8)                                                                  | 72.6 (6.4)       | 77.9 (17.8)      | 104.8 (13.7)                                                                                                                                                      | 70.9 (7.8)      | 74.4 (18.1)      |
| FVC% predicted (%)               | 101.9 (13.2)                                                                  | 72.7 (7.6)       | 92.6 (16.7)      | 101.5 (13.6)                                                                                                                                                      | 70.6 (9.0)      | 88.5 (17.2)*     |
| FEV <sub>1</sub> /FVC (%)        | 78.6 (4.7)                                                                    | 76.3 (5.1)       | 63.5 (6.7)       | 78.7 (4.7)                                                                                                                                                        | 76.7 (5.0)      | 63.2 (6.4)       |
| DLCO (mmol/min/kPA)              | 7.5 (1.5)                                                                     | 7.2 (1.4)        | 7.2 (1.7)        | 7.2 (1.4)*                                                                                                                                                        | 7.5 (1.4)       | 6.7 (1.5)*       |
| DLCO/VA (mmol/min/kPA)           | 1.5 (0.2)                                                                     | 1.6 (0.2)        | 1.4 (0.3)        | 1.5 (0.2)                                                                                                                                                         | 1.5 (0.3)       | 1.3 (0.3)        |

PRISm = Preserved Ratio Impaired Spirometry; COPD = Chronic Obstructive Pulmonary Disease; BMI = body mass index; FEV<sub>1</sub> = Forced expiratory volume in one second; FVC = Forced vital capacity; DLCO = diffusion capacity of the lung for carbon monoxide; DLCO/VA = diffusion capacity of the lung for carbon monoxide per alveolar volume. \*P<0.05 compared to subjects with follow-up. Results are presented as mean (SD), count (percentage) or median (interquartile range).

Table S2. Lung function values at phase 1 and phase 2 stratified by lung function category and smoking status at phase 2.

|                                        |                         | Normal spirometry-<br>P1(n=1276) | PRISm-P1 (n=89)     | COPD GOLD1-4-P1<br>(n=238) | COPD GOLD1-P1(n=114) | COPD GOLD 2-4-P1<br>(n=124) |
|----------------------------------------|-------------------------|----------------------------------|---------------------|----------------------------|----------------------|-----------------------------|
| Years between P1 and P2                |                         | 4.6 (0.5)                        | 4.6 (0.4)           | 4.6 (0.4)                  | 4.6 (0.4)            | 4.6 (0.4)                   |
| FEV <sub>1</sub> % predicted at P1 (%) |                         | 104.8 (13.8)                     | 72.6 (6.4)*         | 77.9 (17.8)*               | 92.9 (9.8)*          | 64.1 (11.2)*                |
| FEV <sub>1</sub> % predicted at P2 (%) |                         | 102.0 (15.9)                     | 72.8 (13.6)*        | 78.3 (19.9)*               | 91.5 (13.2)*         | 66.2 (17.2)*                |
| Δ FEV <sub>1</sub><br>(ml/year)        | All (n=1603)            | -45.0 (-75.2, -17.4)             | -20.4 (-67.0, 1.9)* | -31.0 (-60.3, 4.4)*        | -39.4 (-63.3, -14.1) | -21.6 (-46.9, 19.3)*        |
|                                        | Never smokers (n=534)   | -46.0 (-76.4, -20.0)             | -25.2 (-44.6, -2.2) | -29.7 (-56.8, 3.7)*        | -32.4 (-72.1, -21.3) | -8.2 (-39.5, 15.3)*         |
|                                        | Former smokers (n=949)  | -43.5 (-74.5, -15.8)             | -16.4 (-71.5, 1.0)* | -29.9 (-58.6, 5.4)*        | -37.9 (-61.9, -12.6) | -22.0 (-48.2, 25.9)*        |
|                                        | Current smokers (n=120) | -49.3 (-75.1, -25.3)             | -19.7 (-28.6, -1.5) | -40.8 (-65.1, -15.7)       | -56.1 (-85.8, -22.0) | -29.2 (-44.8, -6.7)         |
| FVC% predicted at P1 (%)               |                         | 101.9 (13.2)                     | 72.7 (7.6)*         | 92.6 (16.8)*               | 105.4 (11.2)*        | 81.0 (11.8)*                |
| FVC% predicted at P2 (%)               |                         | 104.4 (15.3)                     | 78.9 (13.5)*        | 97.7 (18.1)*               | 108.7 (15.0)*        | 87.6 (14.5)*                |
| Δ FVC<br>(ml/year)                     | All (n=1603)            | -20.2 (-55.8, 20.4)              | 5.5 (-38.4, 59.0)*  | -2.0 (-46.4, 50.2)*        | -6.7 (-66.1, 34.2)   | 8.0 (-37.6, 65.5)*          |
|                                        | Never smokers (n=534)   | -25.3 (-63.9, 10.6)              | -13.4 (-37.0, 48.3) | -9.5 (-59.9, 25.1)         | -16.4 (-72.0, 4.5)   | -5.6 (-43.8, 29.3)          |
|                                        | Former smokers (n=949)  | -17.6 (-53.5, 22.7)              | 5.7 (-45.2, 60.1)*  | 2.4 (-43.3, 65.5)*         | -4.1 (-48.2, 53.1)   | 12.0 (-36.8, 81.5)*         |
|                                        | Current smokers (n=120) | -9.0 (-49.0, 23.8]               | 39.3 (12.6, 105.8)  | -23.4 (-57.2, 25.3)        | -42.1 (-80.3, 8.1)   | 7.2 (-33.5, 44.2]           |

PRISm = Preserved Ratio Impaired Spirometry; COPD = Chronic Obstructive Pulmonary Disease; GOLD = Global initiative for Chronic Obstructive Lung Disease; P1 = phase 1; P2 = phase 2; FEV<sub>1</sub> = Forced Expiratory Volume in one second; FVC = Forced Vital Capacity; Δ = delta. \*P<0.05 compared to subjects with normal spirometry. Results are presented as mean (SD) or median (interquartile range).

Table S3. Characteristics at phase 1 by lung function category at phase 1 and phase 2.

|                                     | Normal (n=1276) |                 |                 | PRISm (n=89)   |                  |                  | COPD (n=238)    |                  |                  |
|-------------------------------------|-----------------|-----------------|-----------------|----------------|------------------|------------------|-----------------|------------------|------------------|
|                                     | Normal (n=931)  | PRISm (n=47)    | COPD (n=298)    | Normal (n=14)  | PRISm (n=31)     | COPD (n=44)      | Normal (n=25)   | PRISm (n=5)      | COPD (n=208)     |
| Years between P2 and P2             | 4.7 (0.5)       | 4.9 (0.5)       | 4.8 (0.5)       | 4.6 (0.4)      | 4.8 (0.4)        | 4.8 (0.4)        | 4.7 (0.3)       | 5.3 (0.4)        | 4.7 (0.4)        |
| Age (years)                         | 73.3 (4.6)      | 75.5 (5.9)      | 74.6 (5.2)      | 72.9 (3.3)     | 74.9 (6.4)       | 75.1 (5.7)       | 73.7 (4.4)      | 80.3 (3.8)       | 74.3 (5.1)       |
| Female sex                          | 561 (60.3)      | 27 (57.4)       | 141 (47.3)      | 12 (85.7)      | 15 (48.4)        | 24 (54.5)        | 15 (60.0)       | 2 (40.0)         | 89 (42.8)        |
| BMI (kg/m <sup>2</sup> ) P1         | 27.7 (4.2)      | 29.0 (4.7)      | 27.2 (3.7)      | 28.3 (3.9)     | 30.2 (4.1)       | 28.7 (3.6)       | 26.0 (4.3)      | 29.5 (4.8)       | 26.6 (3.8)       |
| BMI (kg/m <sup>2</sup> ) P2         | 27.5 (4.2)      | 29.3 (5.0)      | 27.0 (3.8)      | 28.2 (4.0)     | 29.7 (4.4)       | 28.5 (3.9)       | 25.9 (4.3)      | 27.4 (5.4)       | 26.3 (3.9)       |
| Δ BMI (kg/m <sup>2</sup> )          | -0.2 (1.6)      | 0.3 (1.9)       | -0.1 (1.5)      | -0.1 (1.1)     | -0.5 (2.2)       | -0.2 (1.2)       | -0.02 (0.2)     | -0.4 (0.9)       | -0.1 (0.3)       |
| Δ BMI > 1.5 kg/m <sup>2</sup> (%)   | 109 (11.7)      | 12 (25.5)       | 32 (10.7)       | 1 (7.1)        | 5 (16.1)         | 3 (6.8)          | 2 (8.0)         | 1 (20.0)         | 25 (12.0)        |
| Waist circumference (cm) P1         | 92.9 (11.7)     | 97.2 (14.5)     | 92.9 (11.7)     | 92.8 (12.4)    | 101.1 (9.4)      | 99.1 (12.1)      | 88.1 (14.0)     | 101.6 (16.9)     | 94.1 (12.3)      |
| Waist circumference (cm) P2         | 94.5 (12.3)     | 101.4 (15.2)    | 95.2 (12.0)     | 93.4 (11.5)    | 101.1 (11.0)     | 101.1 (12.2)     | 90.7 (12.5)     | 99.1 (17.4)      | 95.4 (12.4)      |
| Δ waist circumference (cm)          | 1.6 (6.9)       | 4.2 (6.8)       | 2.3 (5.6)       | 0.6 (3.7)      | -0.1 (6.8)       | 2.0 (6.6)        | 2.6 (4.8)       | -2.5 (8.8)       | 1.3 (5.5)        |
| Height (cm)                         | 166.9 (9.0)     | 167.1 (7.3)     | 169.1 (9.0)     | 162.5 (7.7)    | 167.0 (9.7)      | 167.9 (9.5)      | 166.7 (9.7)     | 173.6 (9.9)      | 170.5 (9.6)      |
| Current smokers                     | 44 (4.7)        | 4 (8.5)         | 37 (12.4)       | 1 (7.1)        | 1 (3.2)          | 4 (9.1)          | 3 (12.0)        | 0 (0.0)          | 26 (12.5)        |
| Pack-years (years)                  | 1.9 (0.0, 16.0) | 3.0 (0.0, 20.5) | 8.8 (0.0, 25.4) | 0.5 (0.0, 7.1) | 16.2 (0.1, 32.5) | 11.2 (0.0, 30.8) | 6.5 (0.5, 15.8) | 16.0 (8.5, 25.0) | 21.6 (2.9, 44.3) |
| Total cholesterol (mmol/l)          | 5.5 (1.1)       | 5.4 (1.2)       | 5.3 (1.1)       | 5.4 (0.9)      | 5.0 (1.0)        | 5.2 (1.2)        | 5.2 (1.1)       | 5.0 (1.1)        | 5.4 (1.0)        |
| HDL-cholesterol (mmol/l)            | 1.5 (0.4)       | 1.4 (0.3)       | 1.5 (0.4)       | 1.5 (0.4)      | 1.4 (0.4)        | 1.4 (0.4)        | 1.6 (0.5)       | 1.3 (0.6)        | 1.5 (0.4)        |
| Tryglicerides (mmol/l)              | 1.3 (1.0, 1.7)  | 1.3 (1.1, 1.6)  | 1.2 (1.0, 1.7)  | 1.5 (1.1, 1.7) | 1.4 (1.1, 1.9)   | 1.4 (1.0, 1.9)   | 1.1 (0.9, 1.4)  | 1.4 (1.1, 1.6)   | 1.2 (0.9, 1.6)   |
| Glucosis (mmol/l)                   | 5.5 (5.1, 6.1)  | 5.7 (5.2, 6.5)  | 5.5 (5.2, 6.1)  | 5.5 (4.9, 5.9) | 5.9 (5.5, 6.5)   | 5.5 (5.1, 6.3)   | 5.3 (4.9, 5.7)  | 5.7 (5.4, 6.5)   | 5.5 (5.1, 6.0)   |
| White blood cell count              | 6.8 (1.7)       | 7.0 (1.9)       | 6.9 (1.5)       | 7.1 (1.1)      | 7.6 (2.2)        | 7.5 (1.8)        | 7.1 (1.7)       | 7.1 (3.0)        | 7.2 (1.7)        |
| Diabetes mellitus                   | 73 (8.0)        | 6 (12.8)        | 18 (6.1)        | 1 (7.7)        | 2 (6.5)          | 3 (6.8)          | 1 (4.0)         | 0 (0.0)          | 20 (9.9)         |
| Hypertension                        | 775 (83.2)      | 40 (85.1)       | 250 (83.9)      | 13 (92.9)      | 29 (93.5)        | 38 (86.4)        | 23 (92.0)       | 5 (100.0)        | 174 (83.7)       |
| Prevalent Heart failure             | 25 (2.7)        | 1 (2.1)         | 8 (2.7)         | 0 (0.0)        | 2 (6.5)          | 2 (4.5)          | 0 (0.0)         | 0 (0.0)          | 11 (5.3)         |
| Incident Heart failure              | 8 (0.9)         | 5 (10.9)        | 2 (0.7)         | 0 (0.0)        | 4 (13.8)         | 3 (7.1)          | 1 (4.0)         | 0 (0.0)          | 6 (339)          |
| Prevalent coronary heart disease    | 91 (9.8)        | 5 (10.6)        | 27 (9.1)        | 1 (7.1)        | 4 (12.9)         | 7 (15.9)         | 5 (20.0)        | 0 (0.0)          | 28 (13.5)        |
| Incident coronary heart disease     | 14 (1.7)        | 1 (2.4)         | 11 (4.1)        | 0 (0.0)        | 0 (0.0)          | 1 (2.7)          | 2 (10.0)        | 0 (0.0)          | 6 (3.3)          |
| Deaths after P2                     | 42 (4.5)        | 7 (14.6)        | 20 (6.7)        | 1 (7.1)        | 4 (12.9)         | 2 (4.5)          | 1 (4.0)         | 2 (40.0)         | 17 (8.2)         |
| Follow-up after P2 (person-years)   | 3135.4          | 157.6           | 1009.0          | 45.7           | 96.0             | 147.2            | 88.4            | 17.3             | 701.7            |
| Mortality rate per 1000 PY after P2 | 13.4            | 44.4            | 19.8            | 21.9           | 41.7             | 13.6             | 11.3            | 115.5            | 24.2             |
| Mortality rate ratio after P2       | Ref             | 3.3             | 1.5             | 1.6            | 3.1              | 1.0              | 0.8             | 8.6              | 1.8              |

PRISm = Preserved Ratio Impaired Spirometry; COPD = Chronic Obstructive Pulmonary Disease; BMI = body mass index; HDL = high-density cholesterol; P1 = phase 1; P2 = phase 2. Results are presented as mean (SD), count (percentage) or median (interquartile range)

Table S4. Lung function values at phase 1 and phase 2 stratified by lung function category at phase 1 and phase 2.

|                         | Normal (1276)        |                        |                      | PRISm (89)         |                     |                      | COPD (238)          |                       |                     |
|-------------------------|----------------------|------------------------|----------------------|--------------------|---------------------|----------------------|---------------------|-----------------------|---------------------|
|                         | Normal (931)         | PRISm (47)             | COPD (298)           | Normal (14)        | PRISm (31)          | COPD (44)            | Normal (25)         | PRISm (5)             | COPD (208)          |
| FEV1% predicted P1      | 107.2 (13.9)         | 91.5 (8.9)             | 99.5 (11.5)          | 75.5 (4.0)         | 72.0 (6.9)          | 72.1 (6.6)           | 86.7 (15.8)         | 68.9 (7.6)            | 77.0 (17.9)         |
| FEV1% predicted P2      | 106.3 (14.1)         | 73.8 (5.6)             | 92.9 (13.8)          | 92.5 (12.3)        | 69.0 (8.9)          | 69.2 (11.3)          | 101.5 (13.5)        | 65.9 (8.9)            | 75.8 (18.9)         |
| Δ FEV1 (ml/year)        | -40.6 (-65.9, -13.0) | -104.9 (-146.6, -73.1) | -62.2 (-92.8, -32.1) | 43.7 (7.7, 75.7)   | -31.0 (-69.6, -7.7) | -36.7 (-74.3, -10.6) | 27.1 (-22.1, 106.7) | -24.9 (-86.9, 0.0)    | -36.2 (-64.0, -4.1) |
| FVC% predicted P1       | 102.9 (13.4)         | 87.8 (8.1)             | 101.3 (11.9)         | 72.8 (5.9)         | 69.1 (7.4)          | 75.3 (7.3)           | 101.7 (15.8)        | 76.5 (6.1)            | 91.9 (16.6)         |
| FVC% predicted P2       | 105.6 (14.3)         | 74.2 (7.6)             | 105.3 (14.6)         | 91.8 (11.2)        | 70.1 (9.9)          | 81.0 (12.3)          | 99.2 (12.9)         | 64.9 (8.3)            | 98.4 (18.1)         |
| Δ FVC (ml/year)         | -20.6 (-56.8, 19.3)  | -91.3 (-171.6, 52.7)   | -11.9 (-40.1, 51.9)  | 76.2 (49.5, 119.5) | -20.6 (-48.9, 22.2) | -11.9 (-40.1, 51.9)  | -51.3 (-82.6, 8.7)  | -103.3 (-157.7, 47.7) | 7.1 (-39.8, 56.3)   |
| FEV1/FVC P1             | 79.8 (4.4)           | 79.4 (3.9)             | 74.7 (3.6)           | 80.3 (5.5)         | 79.7 (4.5)          | 72.7 (2.1)           | 65.0 (5.1)          | 67.1 (4.7)            | 63.2 (6.9)          |
| FEV1/FVC P2             | 76.4 (4.4)           | 75.3 (4.8)             | 66.4 (2.9)           | 77.0 (3.5)         | 74.6 (3.5)          | 64.3 (4.0)           | 77.5 (5.9)          | 75.1 (2.2)            | 57.7 (8.7)          |
| Δ FEV1/FVC (%)          | -3.4 (4.5)           | -4.1 (5.4)             | -8.3 (4.1)           | -3.3 (5.9)         | -5.1 (4.7)          | -8.4 (4.4)           | 12.5 (8.9)          | 8.0 (3.1)             | -5.5 (5.6)          |
| DLCO (mmol/min/kPA)     | 7.5 (1.5)            | 7.2 (1.2)              | 7.5 (1.5)            | 6.4 (1.0)          | 7.2 (1.2)           | 7.6 (1.6)            | 7.2 (1.1)           | 8.4 (1.1)             | 7.1 (1.8)           |
| DLCO % predicted (%)    | 97.7 (13.7)          | 95.3 (17.1)            | 96.0 (14.9)          | 89.1 (12.5)        | 95.7 (22.0)         | 94.6 (20.0)          | 96.6 (9.9)          | 109.9 (15.9)          | 88.5 (19.4)         |
| DLCO/VA (mmol/min/kPA)  | 1.5 (0.2)            | 1.6 (0.2)              | 1.4 (0.2)            | 1.6 (0.2)          | 1.7 (0.3)           | 1.6 (0.2)            | 1.5 (0.2)           | 1.6 (0.2)             | 1.3 (0.3)           |
| DLCO/VA % predicted (%) | 112.3 (16.0)         | 120.7 (17.2)           | 109.1 (17.4)         | 116.6 (11.0)       | 125.8 (21.1)        | 109.1 (17.4)         | 110.8 (14.9)        | 129.6 (16.3)          | 102.2 (20.2)        |

PRISm = Preserved Ratio Impaired Spirometry; COPD = Chronic Obstructive Pulmonary Disease; FEV<sub>1</sub> = Forced expiratory volume in one second; FVC = Forced vital capacity; P1 = phase 1; P2 = P2; Δ = delta; DLCO = diffusion capacity of the lung for carbon monoxide; DLCO/VA = diffusion capacity of the lung for carbon monoxide per alveolar volume. Results are presented as mean (SD) and median (interquartile range)

Table S5. Estimates of mortality stratified by lung function categories.

|                                                                      | Number<br>at risk | All<br>deaths | Follow-up<br>(years) | Mortality<br>rate (per<br>1000 PY) | Mortality<br>rate ratio | HR [95%CI] <sup>1</sup> | HR [95%CI] <sup>2</sup> | HR [95%CI] <sup>3</sup> | HR [95%CI] <sup>4</sup> | CV<br>deaths | Follow-<br>up<br>(years) | Mortality<br>rate (per<br>1000 PY) | Mortality<br>rate ratio | HR [95%CI] <sup>1</sup> | HR [95%CI] <sup>4</sup> |
|----------------------------------------------------------------------|-------------------|---------------|----------------------|------------------------------------|-------------------------|-------------------------|-------------------------|-------------------------|-------------------------|--------------|--------------------------|------------------------------------|-------------------------|-------------------------|-------------------------|
| Total<br>population                                                  | 5446              | 686           | 35766                | 19.2                               | NA                      | NA                      | NA                      | NA                      | NA                      | 82           | 15771                    | 5.2                                | NA                      | NA                      | NA                      |
| Global initiative for Obstructive Lung Disease (GOLD) definition     |                   |               |                      |                                    |                         |                         |                         |                         |                         |              |                          |                                    |                         |                         |                         |
| Normal                                                               | 4150              | 425           | 27517                | 15.4                               | Reference               | Reference               | Reference               | Reference               | Reference               | 43           | 11973                    | 3.6                                | Reference               | Reference               | Reference               |
| PRISm                                                                | 384               | 71            | 2441                 | 29.1                               | 1.9                     | 1.6 [1.2-2.0]           | 1.6 [1.3, 2.1]          | 1.6 [1.2, 2.0]          | 1.6 [1.2, 2.0]          | 15           | 111                      | 13.5                               | 3.8                     | 2.7 [1.5, 5.0]          | 2.6 [1.4, 4.7]          |
| FEV <sub>1</sub> ≥74%                                                | 194               | 30            | 1261                 | 23.8                               | 1.5                     | 1.3 [0.9, 1.8]          | NP                      | NP                      | 1.4 [1.0, 1.9]          | 7            | 566                      | 12.4                               | 3.4                     | 2.6 [1.1, 5.7]          | 2.5 [1.1, 5.5]          |
| FEV <sub>1</sub> <74%                                                | 190               | 41            | 1180                 | 34.7                               | 2.3                     | 1.9 [1.4, 2.6]          | NP                      | NP                      | 1.7 [1.3, 2.3]          | 8            | 545                      | 14.7                               | 4.1                     | 2.8 [1.3, 6.0]          | 2.6 [1.2, 5.7]          |
| FVC≥73%                                                              | 191               | 28            | 1226                 | 22.8                               | 1.5                     | 1.4 [1.0, 2.1]          | NP                      | NP                      | 1.4 [0.9, 2.0]          | 4            | 536                      | 7.5                                | 2.1                     | 1.8 [0.7, 5.1]          | 1.7 [0.6, 4.8]          |
| FVC<73%                                                              | 193               | 43            | 1215                 | 35.4                               | 2.3                     | 1.7 [1.2, 2.3]          | NP                      | NP                      | 1.7 [1.3, 2.3]          | 11           | 575                      | 19.1                               | 5.3                     | 3.2 [1.6, 6.4]          | 3.1 [1.6, 6.1]          |
| COPD GOLD1                                                           | 419               | 52            | 2735                 | 19.0                               | 1.2                     | 1.0 [0.7, 1.3]          | 1.0 [0.7, 1.3]          | 1.0 [0.7, 1.3]          | 0.7 [0.5, 0.9]          | 3            | 1187                     | 2.5                                | 0.7                     | 0.5 [0.2, 1.6]          | 0.5 [0.1, 1.5]          |
| COPD GOLD2-4                                                         | 493               | 138           | 3073                 | 44.9                               | 2.9                     | 1.7 [1.4, 2.1]          | 1.8 [1.4, 2.2]          | 1.7 [1.4, 2.1]          | 1.5 [1.2, 1.8]          | 21           | 1499                     | 14.0                               | 3.9                     | 1.9 [1.1, 3.4]          | 1.8 [1.0, 3.1]          |
| Global Lung Initiative definition (GLI): Lower Limit of Normal (LLN) |                   |               |                      |                                    |                         |                         |                         |                         |                         |              |                          |                                    |                         |                         |                         |
| NL                                                                   | 4791              | 541           | 31712                | 17.1                               | Reference               | Reference               | NP                      | NP                      | Reference               | 62           | 13944                    | 4.4                                | Reference               | Reference               | Reference               |
| PRISm                                                                | 279               | 63            | 1751                 | 36.0                               | 2.1                     | 1.9 [1.5, 2.5]          | NP                      | NP                      | 1.8 [1.4, 2.3]          | 9            | 816                      | 11.0                               | 2.5                     | 2.2 [1.1, 4.5]          | 2.1 [1.0, 4.2]          |
| FEV <sub>1</sub> ≥66%                                                | 139               | 26            | 847                  | 30.7                               | 1.8                     | 1.2 [1.4, 2.3]          | NP                      | NP                      | NP                      | 2            | 364                      | 5.5                                | 1.3                     | 1.8 [0.8, 4.0]          | NP                      |
| FEV <sub>1</sub> <66%                                                | 140               | 37            | 904                  | 40.9                               | 2.4                     | 1.8 [1.4, 2.4]          | NP                      | NP                      | NP                      | 7            | 452                      | 15.5                               | 3.5                     | 2.6 [1.5, 4.5]          | NP                      |
| FVC≥69%                                                              | 141               | 27            | 891                  | 30.3                               | 1.8                     | 1.4 [1.0, 1.8]          | NP                      | NP                      | NP                      | 1            | 402                      | 2.5                                | 0.6                     | 1.7 [0.8, 3.6]          | NP                      |
| FVC<69%                                                              | 138               | 36            | 860                  | 41.9                               | 4.5                     | 1.7 [1.3, 2.2]          | NP                      | NP                      | NP                      | 8            | 414                      | 19.3                               | 4.4                     | 3.3 [1.8, 5.9]          | NP                      |
| COPD GOLD1                                                           | 131               | 17            | 822                  | 20.7                               | 1.2                     | 1.4 [0.8, 2.2]          | NP                      | NP                      | 1.1 [0.7, 1.7]          | 1            | 335                      | 3.0                                | 0.7                     | 0.7 [0.1, 5.4]          | NA                      |
| COPD GOLD2-4                                                         | 245               | 65            | 1480                 | 43.9                               | 2.6                     | 1.9 [1.5, 2.5]          | NP                      | NP                      | 1.6 [1.3, 2.1]          | 10           | 676                      | 14.8                               | 3.4                     | 2.1 [1.0, 4.3]          | 2.0 [1.0, 4.2]          |
| Subgroup with spirometry measurements at both phase 1 and phase 2*   |                   |               |                      |                                    |                         |                         |                         |                         |                         |              |                          |                                    |                         |                         |                         |
| Persistent NL                                                        | 924               | 42            | 3135                 | 13.4                               | Reference               | Reference               | NP                      | NP                      | NA                      | 1            | NA                       | NA                                 | NA                      | NA                      | NA                      |
| Persistent<br>PRISm                                                  | 31                | 4             | 96                   | 42.7                               | 3.2                     | 2.2 [0.8, 6.1]          | NP                      | NP                      | NA                      | 0            | NA                       | NA                                 | NA                      | NA                      | NA                      |
| Incident PRISm                                                       | 52                | 9             | 174                  | 51.5                               | 3.8                     | 2.4 [1.1, 4.9]          | NP                      | NP                      | NA                      | 0            | NA                       | NA                                 | NA                      | NA                      | NA                      |
| Persistent<br>COPD                                                   | 208               | 17            | 702                  | 24.2                               | 1.8                     | 1.0 [0.6, 1.9]          | NP                      | NP                      | NA                      | 0            | NA                       | NA                                 | NA                      | NA                      | NA                      |
| Incident COPD                                                        | 342               | 22            | 1156                 | 19.0                               | 1.4                     | 0.9 [0.5, 1.5]          | NP                      | NP                      | NA                      | 0            | NA                       | NA                                 | NA                      | NA                      | NA                      |

HR = Hazard Ratio; CV = cardiovascular; GOLD = Global initiative for Chronic Obstructive Lung Disease; PRISm = Preserved Ratio Impaired Spirometry; COPD = Chronic Obstructive Pulmonary Disease; FEV<sub>1</sub> = Forced Expiratory volume in one second; FVC = Forced Vital Capacity; PY = person-years; NA = not applicable; NP = Not Performed; <sup>1</sup> = HR adjusted for age, sex, BMI, current smoking and pack-years; <sup>2</sup> = HR adjusted for age, sex, BMI, current smoking and pack-years and subjects with physician-diagnosed asthma excluded; <sup>3</sup> = HR adjusted for age, sex, BMI, current smoking, pack-years and cardiovascular comorbidity (heart failure and/or coronary heart disease); <sup>4</sup> = time-dependent HR adjusted for age, sex, BMI, current smoking and pack-years with lung function category at phase 2 as time varying covariate; \* follow-up time start after spirometry at phase 2. Subjects with missing information for one of the covariates were excluded (n=13, of whom 6 died).

Table S6. ICD10 classification of cause-specific mortality.

| ICD10 code                                                   |                                                                                        | Normal      | PRISm      | COPD       |
|--------------------------------------------------------------|----------------------------------------------------------------------------------------|-------------|------------|------------|
| C00-D48                                                      | Neoplasms                                                                              | 81 (47.6%)  | 11 (29.7%) | 38 (48.7%) |
| I00-I99                                                      | Diseases of the circulatory system                                                     | 43 (25.3%)  | 15 (40.6%) | 24 (30.8%) |
| F00-F99                                                      | Mental and behavioural disorders                                                       | 12 (7.1%)   | 3 (8.1%)   | 6 (7.7%)   |
| R00-R99                                                      | Symptoms, signs and abnormal clinical and laboratory findings not elsewhere classified | 15 (8.8%)   | 3 (8.1%)   | 2 (2.6%)   |
| J00-J99                                                      | Diseases of the respiratory system                                                     | 4 (2.3%)    | 4 (10.8%)  | 6 (7.7%)   |
| G00-G99                                                      | Diseases of the nervous system                                                         | 4 (2.3%)    | 1 (2.7%)   | 0 (0.0%)   |
| K00-K93                                                      | Diseases of the digestive system                                                       | 4 (2.3%)    | 0 (0.0%)   | 0 (0.0%)   |
| V01-Y98                                                      | External causes of morbidity and mortality                                             | 3 (1.8%)    | 0 (0.0%)   | 1 (1.3%)   |
| S00-T98                                                      | Injury, poisoning and certain other consequences of external causes                    | 2 (1.2%)    | 0 (0.0%)   | 1 (1.3%)   |
| A00-B99                                                      | Certain infectious and parasitic diseases                                              | 1 (0.6%)    | 0 (0.0%)   | 0 (0.0%)   |
| M00-M99                                                      | Diseases of the musculoskeletal system and connective tissue                           | 1 (0.6%)    | 0 (0.0%)   | 0 (0.0%)   |
| Total deaths with ICD10 code registration (until 01/01/2015) |                                                                                        | 170 (39.5%) | 37 (51.4%) | 78 (41.1%) |
| Total deaths (until 30/06/2018)                              |                                                                                        | 430         | 72         | 190        |

ICD = International Classification Of Diseases; PRISm = Preserved Ratio Impaired Spirometry; COPD = Chronic Obstructive Pulmonary Disease.



Figure S1. Flowchart of the Rotterdam Study

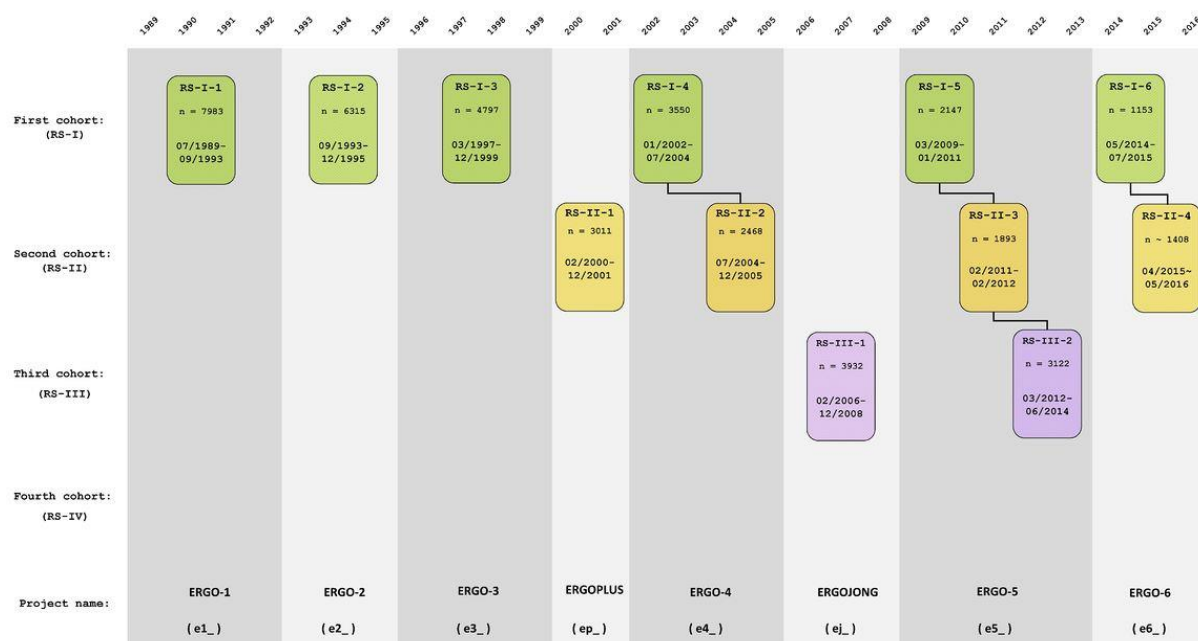

Diagram of examination cycles of the Rotterdam Study (RS). RS-I-1 refers to the baseline examination of the original cohort (pilot phase 07/1989–12/1989; cohort recruitment 01/1990–09/1993). RS-I-2, RS-I-3, RS-I-4, RS-I-5, and RS-I-6 refer to re-examinations of the original cohort members. RS-II-1 refers to the extension of the cohort with persons in the study district that became 55 years since the start of the study or those of 55 years or over that migrated into the study district. RS-II-2, RS-II-3, and RS-II-4 refer to re-examinations of the extension cohort. RS-III-1 refers to the baseline examination of all persons aged 45 years and over living in the study district that had not been examined already (i.e., mainly comprising those aged 45–60 years). RS-III-2 refers to the first re-examination of this third cohort. Examination RS-I-4 and RS-II-2 were conducted as one project and feature an identical research program. Similarly, examinations RS-I-5, RS-II-3, and RS-III-2 share the same program items. Also, examinations RS-I-6 and RS-II-4 are conducted as one project. RS-IV-1 refers to the baseline visit of a new cohort, to be established in February 2016.

Figure S2. Age- and sex-specific prevalence, incidence and mortality of PRISm and COPD.

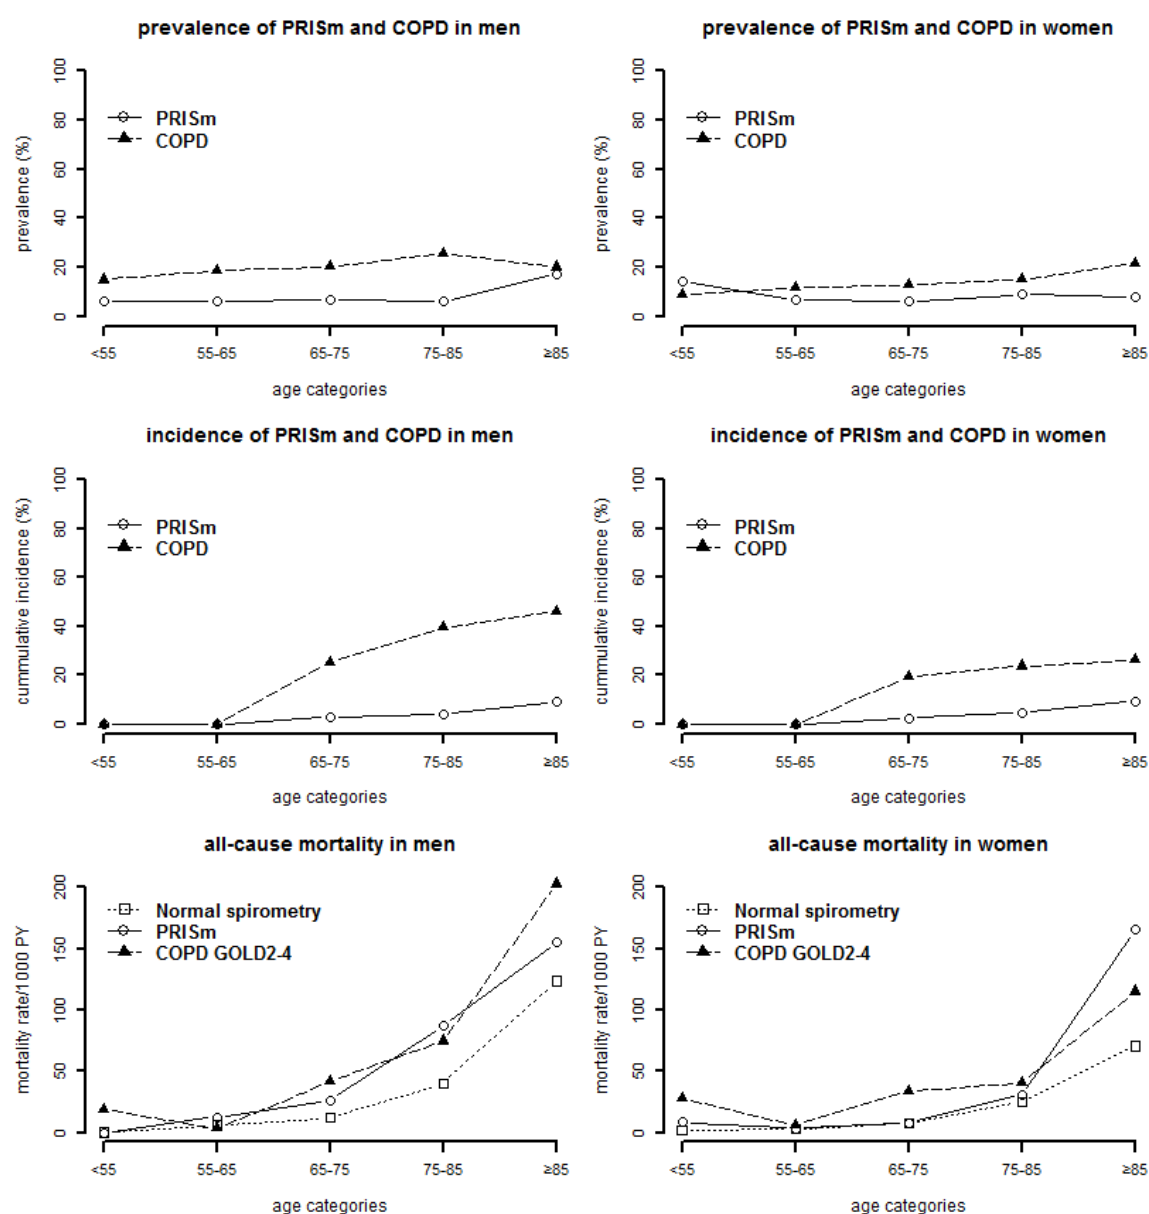

PRISm = Preserved Ratio Impaired Spirometry; COPD = Chronic Obstructive Pulmonary Disease; PY = person-years. Cumulative incidence of PRISm and COPD was calculated in a subset of individuals with spirometry at both phase 1 and phase 2, after exclusion for prevalent PRISm and COPD in the case of incident PRISm (n=1278), and after exclusion of prevalent COPD in the case of incident COPD (n=1365).

Figure S3. Transitions between lung function categories according to GLI definition for FEV<sub>1</sub> and the FEV<sub>1</sub>/FVC ratio.

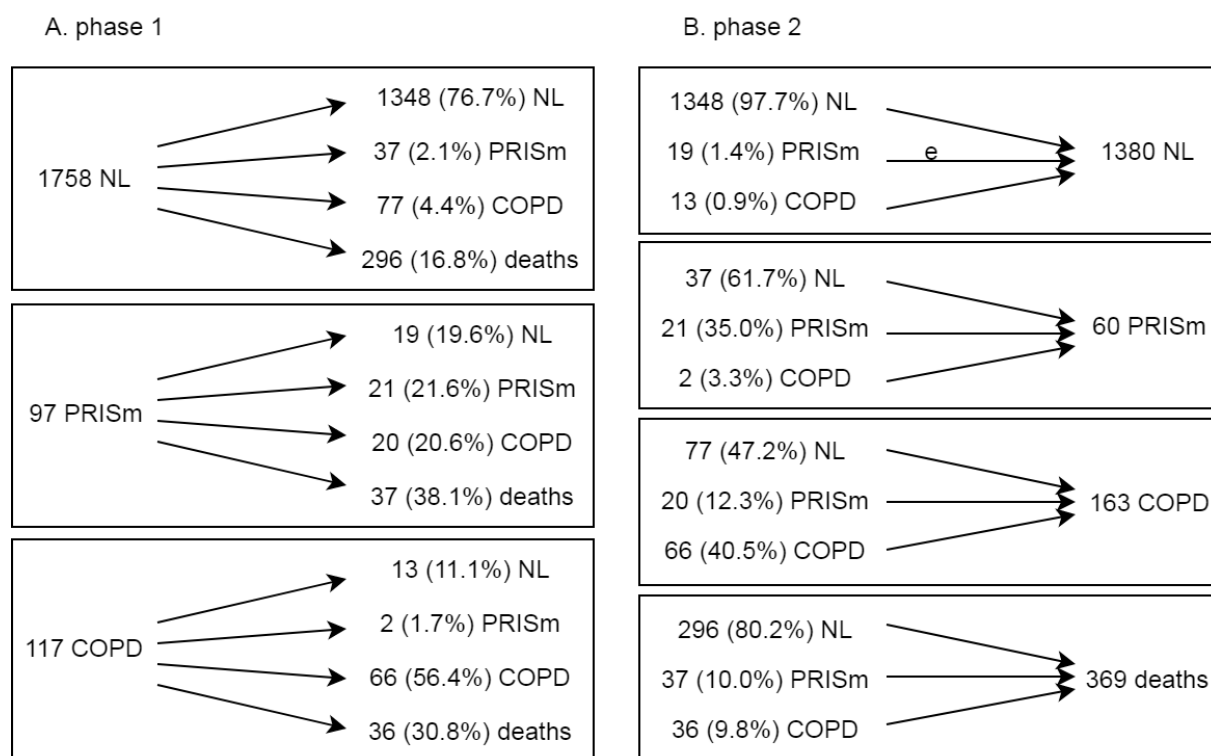

NL = normal spirometry; PRISm = Preserved Ratio Impaired Spirometry; COPD = Chronic Obstructive Pulmonary Disease.
