# Supplementary material
Source: HighWire-hosted journal article supplement (https://erj.ersjournals.com/content/55/1/1901217)
Supplement: inline-supplementary-material-2 [file inline-supplementary-material-2.pdf]

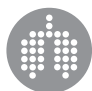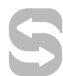

SHAREABLE PDF

# Trajectory and mortality of preserved ratio impaired spirometry: the Rotterdam Study

Sara Renata Alex Wijnant <sup>1,2,3</sup>, Emmely De Roos <sup>1,2</sup>, Maryam Kavousi<sup>2</sup>, Bruno Hugo Stricker <sup>2,4</sup>, Natalie Terzikhan<sup>2</sup>, Lies Lahousse <sup>2,3,6</sup> and Guy G. Brusselle <sup>1,2,5,6</sup>

**Affiliations:** <sup>1</sup>Dept of Respiratory Medicine, Ghent University Hospital, Ghent, Belgium. <sup>2</sup>Dept of Epidemiology, Erasmus Medical Center, Rotterdam, The Netherlands. <sup>3</sup>Dept of Bioanalysis, Faculty of Pharmaceutical Sciences, Ghent University, Ghent, Belgium. <sup>4</sup>Dept of Internal Medicine, Erasmus Medical Center, Rotterdam, The Netherlands. <sup>5</sup>Dept of Respiratory Medicine, Erasmus Medical Center, Rotterdam, The Netherlands. <sup>6</sup>Both authors contributed equally.

**Correspondence:** Guy G. Brusselle, Dept of Respiratory Medicine, University Hospital Ghent, Corneel Heymanslaan 10, 9000 Ghent, Belgium. E-mail: guy.brusselle@ugent.be

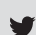

@ERSpublications

**Preserved ratio impaired spirometry, previously called restrictive spirometry, is a condition associated with increased mortality that encompasses distinct clinical subsets** <http://bit.ly/2ncclac>

**Cite this article as:** Wijnant SRA, De Roos E, Kavousi M, *et al.* Trajectory and mortality of preserved ratio impaired spirometry: the Rotterdam Study. *Eur Respir J* 2020; 55: 1901217 [https://doi.org/10.1183/13993003.01217-2019].

This single-page version can be shared freely online.

**ABSTRACT** Preserved ratio impaired spirometry (PRISm) is a heterogeneous condition but its course and disease progression remain to be elucidated. We aimed to examine its prevalence, trajectories and prognosis in the general population.

In the Rotterdam Study (population-based prospective cohort) we examined prevalence, trajectories and prognosis of subjects with normal spirometry (controls; forced expiratory volume in 1 s (FEV<sub>1</sub>)/forced vital capacity (FVC) ≥ 0.7, FEV<sub>1</sub> ≥ 80%), PRISm (FEV<sub>1</sub>/FVC ≥ 0.7, FEV<sub>1</sub> < 80%) and chronic obstructive pulmonary disease (COPD) (FEV<sub>1</sub>/FVC < 0.7) at two study visits. Hazard ratios with 95% confidence intervals for mortality (until December 30, 2018) were adjusted for age, sex, body mass index, current smoking and pack-years.

Of 5487 subjects (age 69.1 ± 8.9 years; 7.1% PRISm), 1603 were re-examined after 4.5 years. Of the re-examined PRISm subjects, 15.7% transitioned to normal spirometry and 49.4% to COPD. Median lung function decline was highest in subjects with incident PRISm (FEV<sub>1</sub> −92.8 mL·year<sup>−1</sup>, interquartile range (IQR) −131.9–−65.8 mL·year<sup>−1</sup>; FVC −93.3 mL·year<sup>−1</sup>, IQR −159.8–−49.1 mL·year<sup>−1</sup>), but similar in persistent PRISm (FEV<sub>1</sub> −30.2 mL·year<sup>−1</sup>, IQR −67.9–−7.5 mL·year<sup>−1</sup>; FVC −20.1 mL·year<sup>−1</sup>, IQR −47.7–21.7 mL·year<sup>−1</sup>) and persistent controls (FEV<sub>1</sub> −39.6 mL·year<sup>−1</sup>, IQR −64.3–−12.7 mL·year<sup>−1</sup>; FVC −20.0 mL·year<sup>−1</sup>, IQR −55.4–18.8 mL·year<sup>−1</sup>). Of 5459 subjects with informed consent for follow-up, 692 (12.7%) died during 9.3 years (maximum) follow-up: 10.3% of controls, 18.7% of PRISm subjects and 20.8% of COPD subjects. Relative to controls, subjects with PRISm and COPD Global Initiative for Chronic Obstructive Lung Disease (GOLD) 2–4 had increased all-cause mortality (PRISm: HR 1.6, 95% CI 1.2–2.0; COPD GOLD 2–4: HR 1.7, 95% CI 1.4–2.1) and cardiovascular mortality (PRISm: HR 2.8, 95% CI 1.5–5.1; COPD 2–4: HR 2.1, 95% CI 1.2–3.6). Mortality within <1 year was highest in PRISm, with patients often having cardiovascular comorbidities (heart failure or coronary heart disease; 70.0%).

PRISm is associated with increased mortality and this population encompasses at least three distinct subsets: one that develops COPD during follow-up, a second with high cardiovascular burden and early mortality, and a third with persistent PRISm and normal age-related lung function decline.
